# Supplementary material
Source: publisher site journal article supplement (https://www.dovepress.com/article/495284)
Supplement: Supplementary file 1 [file get_supplementary_file.php]

**Supplementary Table 1** Correlation of NLR, LMR, PLR, Ferritin, and IL-10 with baseline clinical characteristics in newly diagnosed multiple myeloma patients.

| **Characteristics** | **NLR**  **<4.44** | **NLR**  **≥4.44** | **P value** | **LMR**  **<4.00** | **LMR**  **≥4.00** | **P value** | **PLR**  **<100** | **PLR**  **≥100** | **P value** | **Ferritin**  **≤223** | **Ferritin**  **>223** | **P value** | **IL-10 <1.42** | **IL-10**  **≥1.42** | **P value** |
| --- | --- | --- | --- | --- | --- | --- | --- | --- | --- | --- | --- | --- | --- | --- | --- |
| Sex Male | 161(55.9) | 19(61.3) | 0.565 | 97(63.0) | 82(49.7) | 0.017 | 66(57.4) | 114(55.6) | 0.785 | 32(35.6) | 127(64.1) | <0.001 | 51(52.6) | 54(59.3) | 0.351 |
| Female | 127(44.1) | 12(38.7) |  | 57(37.0) | 83(50.3) |  | 49(42.6) | 91(44.4) |  | 58(64.4) | 71(35.9) |  | 46(47.4) | 37(40.7) |  |
| Age ≤68 years | 221(76.7) | 23(76.4) | 0.751 | 117(76.0) | 128(77.6) | 0.735 | 78(67.8) | 167(81.5) | 0.006 | 73(81.1) | 148(74.7) | 0.236 | 74(76.3) | 70(76.9) | 0.918 |
| >68years | 67(23.3) | 8(25.8) |  | 37(24.0) | 37(22.4) |  | 37(32.2) | 38(18.5) |  | 17(18.9) | 50(25.3) |  | 23(23.7) | 21(23.1) |  |
| D-S 1+2+3A | 247(85.8) | 21(67.7) | 0.009 | 119(77.3) | 149(90.3) | 0.002 | 88(76.5) | 180(87.8) | 0.009 | 88(97.8) | 153(77.3) | <0.001 | 92(94.8) | 69(75.8) | <0.001 |
| 3B | 41(14.2) | 10(32.3) |  | 35(22.7) | 16(9.7) |  | 27(23.5) | 25(12.2) |  | 2(22.2) | 45(22.7) |  | 5(5.2) | 22(24.2) |  |
| ISS 1+2 | 177(61.5) | 12(38.7) | 0.014 | 78(50.6) | 111(67.3) | 0.003 | 55(47.8) | 134(65.4) | 0.002 | 61(67.8) | 105(53.0) | 0.019 | 65(67.0) | 45(49.5) | 0.015 |
| 3 | 111(38.5) | 19(61.3) |  | 76(49.4) | 54(32.7) |  | 60(52.2) | 71(34.6) |  | 29(32.0) | 93(47.0) |  | 32(33.0) | 46(50.5) |  |
| R-ISS 1+2 | 144(62.1) | 15(53.6) | 0.384 | 71(60.7) | 88(61.4) | 0.888 | 43(47.3) | 116(68.2) | 0.001 | 56(73.7) | 90(57.0) | 0.013 | 57(57.9) | 47(57.3) | 0.160 |
| 3 | 88(37.9) | 13(46.4) |  | 46(39.3) | 55(38.5) |  | 48(52.7) | 54(31.8) |  | 20(26.3) | 68(43.0) |  | 27(32.1) | 35(42.7) |  |
| Hb ≥100g/L | 122(42.4) | 12(38.7) | 0.696 | 60(39.0) | 74(44.8) | 0.287 | 33(28.7) | 101(49.3) | <0.001 | 42(46.7) | 82(41.4) | 0.404 | 54(55.7) | 37(40.7) | 0.040 |
| <100g/L | 166(57.6) | 19(61.3) |  | 94(61.0) | 91(55.2) |  | 82(71.3) | 104(50.7) |  | 48(53.3) | 116(58.6) |  | 43(44.3) | 54(59.3) |  |
| NLR ≤4.44 | / * | / * |  | 126(82.4) | 161(97.6) | <0.001 | 112(98.2) | 176(89.5) | <0.001 | 83(92.2) | 178(90.4) | 0.609 | 92(94.8) | 79(86.8) | 0.055 |
| >4.44 | / * | / * |  | 27(17.6) | 4(2.4) |  | 2(1.8) | 29(14.1) |  | 7(7.8) | 19(9.6) |  | 5(5.2) | 12(13.2) |  |
| LMR <4.00 | 126(43.9) | 27(87.1) | <0.001 | / * | / * |  | 42(36.8) | 112(54.6) | 0.002 | 34(37.8) | 110(55.8) | 0.005 | 37(38.1) | 41(45.1) | 0.337 |
| ≥4.00 | 161(56.1) | 4(12.9) |  | / * | / * |  | 72(63.3) | 93(45.4) |  | 56(62.2) | 87(44.2) |  | 60(61.9) | 50(54.9) |  |
| PLR <100 | 112(38.9) | 2(6.5) | <0.001 | 42(27.3) | 72(43.6) | 0.002 | / * | / * |  | 23(25.6) | 82(41.4) | 0.010 | 29(29.9) | 39(42.9) | 0.065 |
| ≥100 | 176(61.1) | 29(93.5) |  | 112(72.7) | 93(56.4) |  | / * | / * |  | 67(74.4) | 116(58.6) |  | 68(70.1) | (57.1) |  |
| CRP<8mg/L | 215(78.2) | 16(51.6) | 0.001 | 106(71.1) | 125(79.6) | 0.085 | 88(80.0) | 144(73.1) | 0.177 | 78(90.7) | 130(67.7) | <0.001 | 86(91.5) | 65(72.2) | 0.001 |
| ≥8mg/L | 60(21.8) | 15(48.4) |  | 43(28.9) | 32(20.4) |  | 22(20.0) | 53(26.9) |  | 8(9.3) | 63(32.3) |  | 8(8.5) | 25(27.8) |  |
| LDH < 245 U/L | 227(79.9) | 17(58.6) | 0.008 | 109(72.2) | 135(83.3) | 0.017 | 82(72.6) | 162(80.6) | 0.101 | 75(84.3) | 148(75.5) | 0.097 | 79(83.2) | 63(70.0) | 0.034 |
| ≥ 245 U/L | 57(20.1) | 12(41.4) |  | 42(27.8) | 27(16.7) |  | 31(27.4) | 39(19.4) |  | 14(15.7) | 48(24.5) |  | 16(16.8) | 27(30.0) |  |
| Cr<177μmol/L | 245(85.1) | 19(61.3) | 0.001 | 117(76.0) | 147(89.1) | 0.002 | 89(77.4) | 175(85.4) | 0.072 | 86(95.6) | 151(76.3) | <0.001 | 91(93.8) | 67(73.6) | <0.001 |
| ≥177μmol/L | 43(14.9) | 12(38.7) |  | 27(24.0) | 18(10.9) |  | 26(22.6) | 30(14.6) |  | 4(4.4) | 47(23.7) |  | 6(6.2) | 24(26.4) |  |
| Albumin>30g/L | 247(85.8) | 26(83.9) | 0.776 | 133(86.4) | 140(84.8) | 0.700 | 92(80.0) | 182(88.8) | 0.032 | 78(86.7) | 170(85.9) | 0.854 | 88(90.7) | 75(82.4) | 0.094 |
| ≤30g/L | 41(14.2) | 5(16.1) |  | 21(13.6) | 25(15.2) |  | 23(20.0) | 23(11.2) |  | 12(13.3) | 28(14.1) |  | 9(9.3) | 16(17.6) |  |
| Ferritin≤223ug/L | 83(31.8) | 7(26.9) | 0.609 | 34(23.6) | 56(39.2) | 0.005 | 23(21.9) | 67(36.6) | 0.010 | / * | / * |  | 39(44.3) | 22(25.9) | 0.011 |
| >223 ug/L | 178(68.2) | 19(73.1) |  | 110(76.4) | 87(60.8) |  | 82(78.1) | 116(63.4) |  | / * | / * |  | 49(55.7) | 63(74.1) |  |
| IL10<1.42pg/ml | 92(53.8) | 5(29.4) | 0.055 | 37(47.4) | 60(54.5) | 0.337 | 29(42.6) | 68(56.7) | 0.095 | 39(63.9) | 49(43.8) | 0.011 | / * | / * |  |
| ≥1.42pg/ml | 79(46.2) | 12(70.6) |  | 41(52.6) | 50(45.5) |  | 39(57.4) | 52(43.3) |  | 22(36.1) | 63(56.3) |  | / * | / * |  |
| BMPCs≤30% | 145(50.3) | 19(61.3) | 0.247 | 80(51.9) | 85(51.3) | 0.938 | 43(37.4) | 122(59.5) | <0.001 | 50(55.6) | 95(48.0) | 0.223 | 57(58.8) | 43(47.3) | 0.114 |
| >30% | 143(49.7) | 12(38.7) |  | 74(48.1) | 80(48.5) |  | 72(62.6) | 83(40.5) |  | 40(44.4) | 103(52.0) |  | 40(41.2) | 48(52.7) |  |
| Treatment efficacy |  |  | 1.000 |  |  | 0.101 |  |  | 0.119 |  |  | 0.011 |  |  | 0.084 |
| ≥PR | 265(92.0) | 28(90.3) |  | 156(94.5) | 138(89.6) |  | 192(93.7) | 102(88.7) |  | 88(97.8) | 176(88.9) |  | 95(97.9) | 83(91.2) |  |
| ＜PR | 23(8.0) | 3(9.7) |  | 9(5.5) | 16(10.4) |  | 13(6.3) | 13(11.3) |  | 2(2.2) | 22(11.1) |  | 2(2.1) | 8(8.8) |  |
| EMM at diagnosed |  |  | 0.355 |  |  | 0.100 |  |  | 0.144 |  |  | 0.480 |  |  | 0.290 |
| Non-EMM | 217(75.3) | 21(67.7) |  | 108(70.1) | 129(78.2) |  | 91(79.1) | 147(71.7) |  | 69(76.7) | 144(72.7) |  | 68(70.1) | 70(76.9) |  |
| EMM | 71(24.7) | 10(32.3) |  | 46(29.9) | 36(21.8) |  | 24(20.9) | 58(28.3) |  | 21(23.3) | 54(27.3) |  | 29(29.9) | 21(23.1) |  |
| Osteolytic lesions |  |  | 0.748 |  |  | 0.466 |  |  | 0.444 |  |  | 0.149 |  |  | 0.662 |
| ≤2 lesions | 230(79.9) | 24(77.4) |  | 120(77.9) | 134(81.2) |  | 89(77.4) | 166(81.0) |  | 75(83.3) | 150(75.8) |  | 71(73.2) | 64(70.3) |  |
| >2 lesions | 58(20.1) | 7(22.6) |  | (34)22.1 | 31(18.8) |  | 26(22.6) | 39(19.0) |  | 15(16.7) | 48(24.2) |  | 26(26.8) | 27(29.7) |  |

* No comparison

**Abbreviations:** NLR neutrophil-to-lymphocyte ratio; LMR, lymphocyte-to-monocyte ratio; PLR, platelet-to-lymphocyte ratio; D-S, Durie-Salmon; ISS, international staging systems; R-ISS, revised-ISS; Hb, hemoglobin; Plt, platelets; CRP, C-reactive protein; LDH, lactate dehydrogenase; Cr, creatinine; BMPCs, bone marrow plasma cells; PR, partial remission; EMM, extramedullary multiple myeloma;.
